# Supplementary material for: ROOT HAIR DEFECTIVE SIX-LIKE Class I Genes Promote Root Hair Development in the Grass Brachypodium distachyon
Source: PubMed Central journal article supplement (PMC4975483; doi:10.1371/journal.pgen.1006211), 2016-08-05
Supplement: pgen.1006211.s006.pdf [file pgen.1006211.s006.pdf]

|               | <b>AtRHD6</b> | <b>AtRSL1</b> |
|---------------|---------------|---------------|
| <b>AtRHD6</b> | 100.0         |               |
| <b>AtRSL1</b> | 93.7          | 100.0         |
| <b>BdRSL1</b> | 84.1          | 84.1          |
| <b>BdRSL2</b> | 88.9          | 87.3          |
| <b>BdRSL3</b> | 73.0          | 71.4          |
